# Supplementary material
Source: publisher figshare collection journal article supplement (https://frontiersin.figshare.com/ndownloader/files/21257721)
Supplement: Supplementary file 1 [file 21257721]

## Sheet: Legend
DATA S4 - Results of generalised least square analyses for genus-level marine actinopterygian data
List of models used in the analyses	List of variables used in the analyses
lm0<-lm(PDE ~ 1 ) #null	SL: sea level
lm0s<-lm(PDE ~ 1 + Sampling)	δ18O: oxygene isotope
lm1<-lm(PDE ~ 1 + SL)	δ34S: sulfur isotope
lm1s<-lm(PDE ~ 1 + SL + Sampling)	δ13C: carbon isotope
lm2<-lm(PDE ~ 1 + δ18O)	Sr: Strontium isotope
lm2s<-lm(PDE ~ 1 + δ18O + Sampling)	Cont.Frag: continental fragmentation index
lm3<-lm(PDE ~ 1 + Sr)	Sampling: number of geological stratae
lm3s<-lm(PDE ~ 1 + Sr + Sampling)
lm4<-lm(PDE ~ 1 + δ34S)
lm4s<-lm(PDE ~ 1 + δ34S + Sampling)
lm5<-lm(PDE ~ 1 + SL + δ18O)	Legend for model ranking
lm5s<-lm(PDE ~ 1 + SL + δ18O + Sampling)	R2: generalized coefficient of determination
lm6<-lm(PDE ~ 1 + SL + Sr)	logLik: log-likelihood value of the model
lm6s<-lm(PDE ~ 1 + SL + Sr + Sampling)	AIC: Akaike’s information criterion
lm7<-lm(PDE ~ 1 + SL + δ34S)	AICc: Akaike’s information criterion for small sample sizes
lm7s<-lm(PDE ~ 1 + SL + δ34S + Sampling)	wAICc: conditional probabilities for each model
lm8<-lm(PDE ~ 1 + δ18O + Sr)	Δ(AICc): differences in AIC scores between a given candidate model and the one with the best fit
lm8s<-lm(PDE ~ 1 + δ18O + Sr + Sampling)	JB: p-value of the Jarque-Bera test against non-normality of the residuals
lm9<-lm(PDE ~ 1 + δ18O + δ34S)	BP: p-value of the Breusch-Pagan test against heteroscedasticity of the residuals
lm9s<-lm(PDE ~ 1 + δ18O + δ34S + Sampling)
lm10<-lm(PDE ~ 1 + Sr + δ34S)
lm10s<-lm(PDE ~ 1 + Sr + δ34S + Sampling)
lm11<-lm(PDE ~ 1 + SL + δ18O + Sr)	Legend for model parameters
lm11s<-lm(PDE ~ 1 + SL + δ18O + Sr + Sampling)	Std. Error: standard error of the estimate
lm12<-lm(PDE ~ 1 + SL + δ18O + δ34S)	p-value: significant at alpha = 0.05
lm12s<-lm(PDE ~ 1 + SL + δ18O + δ34S + Sampling)	Std. Error (HC) and p-value (HC): standard error and p-value computed using heteroskedasticity-consistent estimations of the variance-covariance matrix of coefficient estimates using the H3 type
lm13<-lm(PDE ~ 1 + δ18O + Sr + δ34S)
lm13s<-lm(PDE ~ 1 + δ18O + Sr + δ34S + Sampling)
lm14<-lm(PDE ~ 1 + SL + Sr + δ34S)
lm14s<-lm(PDE ~ 1 + SL + Sr + δ34S + Sampling)
lm15<-lm(PDE ~ 1 + SL + δ18O + Sr + δ34S)
lm15s<-lm(PDE ~ 1 + SL + δ18O + Sr + δ34S + Sampling)
lm16<-lm(PDE ~ 1 + δ13C)
lm16s<-lm(PDE ~ 1 + δ13C + Sampling)
lm17<-lm(PDE ~ 1 + SL + δ13C)
lm17s<-lm(PDE ~ 1 + SL + δ13C + Sampling)
lm18<-lm(PDE ~ 1 + δ18O + δ13C)
lm18s<-lm(PDE ~ 1 + δ18O + δ13C + Sampling)
lm19<-lm(PDE ~ 1 + Sr + δ13C)
lm19s<-lm(PDE ~ 1 + Sr + δ13C + Sampling)
lm20<-lm(PDE ~ 1 + δ34S + δ13C)
lm20s<-lm(PDE ~ 1 + δ34S + δ13C + Sampling)
lm21<-lm(PDE ~ 1 + SL + δ18O + δ13C)
lm21s<-lm(PDE ~ 1 + SL + δ18O + δ13C + Sampling)
lm22<-lm(PDE ~ 1 + SL + Sr + δ13C)
lm22s<-lm(PDE ~ 1 + SL + Sr + δ13C + Sampling)
lm23<-lm(PDE ~ 1 + SL + δ34S + δ13C)
lm23s<-lm(PDE ~ 1 + SL + δ34S + δ13C + Sampling)
lm24<-lm(PDE ~ 1 + δ18O + Sr + δ13C)
lm24s<-lm(PDE ~ 1 + δ18O + Sr + δ13C + Sampling)
lm25<-lm(PDE ~ 1 + δ18O + δ34S + δ13C)
lm25s<-lm(PDE ~ 1 + δ18O + δ34S + δ13C + Sampling)
lm26<-lm(PDE ~ 1 + Sr + δ34S + δ13C)
lm26s<-lm(PDE ~ 1 + Sr + δ34S + δ13C + Sampling)
lm27<-lm(PDE ~ 1 + SL + δ18O + Sr + δ13C)
lm27s<-lm(PDE ~ 1 + SL + δ18O + Sr + δ13C + Sampling)
lm28<-lm(PDE ~ 1 + SL + δ18O + δ34S + δ13C)
lm28s<-lm(PDE ~ 1 + SL + δ18O + δ34S + δ13C + Sampling)
lm29<-lm(PDE ~ 1 + SL + Sr + δ34S + δ13C)
lm29s<-lm(PDE ~ 1 + SL + Sr + δ34S + δ13C + Sampling)
lm30<-lm(PDE ~ 1 + δ18O + Sr + δ34S + δ13C)
lm30s<-lm(PDE ~ 1 + δ18O + Sr + δ34S + δ13C + Sampling)
lm31<-lm(PDE ~ 1 + SL + δ18O + δ34S + δ13C + Sr)
lm31s<-lm(PDE ~ 1 + SL + δ18O + δ34S + δ13C + Sr + Sampling)
lm32<-lm(PDE ~ 1 + Cont.Frag)
lm32s<-lm(PDE ~ 1 + Cont.Frag + Sampling)
lm33<-lm(PDE ~ 1 + SL + Cont.Frag + Sampling)
lm33s<-lm(PDE ~ 1 + SL + Cont.Frag)
lm34<-lm(PDE ~ 1 + δ18O + Cont.Frag)
lm34s<-lm(PDE ~ 1 + δ18O + Cont.Frag + Sampling)
lm35<-lm(PDE ~ 1 + Sr + Cont.Frag)
lm35s<-lm(PDE ~ 1 + Sr + Cont.Frag + Sampling)
lm36<-lm(PDE ~ 1 + δ34S + Cont.Frag)
lm36s<-lm(PDE ~ 1 + δ34S + Cont.Frag + Sampling)
lm37<-lm(PDE ~ 1 + SL + δ18O + Cont.Frag)
lm37s<-lm(PDE ~ 1 + SL + δ18O + Cont.Frag + Sampling)
lm38<-lm(PDE ~ 1 + SL + Sr + Cont.Frag)
lm38s<-lm(PDE ~ 1 + SL + Sr + Cont.Frag + Sampling)
lm39<-lm(PDE ~ 1 + SL + δ34S + Cont.Frag)
lm39s<-lm(PDE ~ 1 + SL + δ34S + Cont.Frag + Sampling)
lm40<-lm(PDE ~ 1 + δ18O + Sr + Cont.Frag)
lm40s<-lm(PDE ~ 1 + δ18O + Sr + Cont.Frag + Sampling)
lm41<-lm(PDE ~ 1 + δ18O + δ34S + Cont.Frag)
lm41s<-lm(PDE ~ 1 + δ18O + δ34S + Cont.Frag + Sampling)
lm42<-lm(PDE ~ 1 + Sr + δ34S + Cont.Frag)
lm42s<-lm(PDE ~ 1 + Sr + δ34S + Cont.Frag + Sampling)
lm43<-lm(PDE ~ 1 + SL + δ18O + Sr + Cont.Frag)
lm43s<-lm(PDE ~ 1 + SL + δ18O + Sr + Cont.Frag + Sampling)
lm44<-lm(PDE ~ 1 + SL + δ18O + δ34S + Cont.Frag)
lm44s<-lm(PDE ~ 1 + SL + δ18O + δ34S + Cont.Frag + Sampling)
lm45<-lm(PDE ~ 1 + δ18O + Sr + δ34S + Cont.Frag)
lm45s<-lm(PDE ~ 1 + δ18O + Sr + δ34S + Cont.Frag + Sampling)
lm46<-lm(PDE ~ 1 + SL + Sr + δ34S + Cont.Frag)
lm46s<-lm(PDE ~ 1 + SL + Sr + δ34S + Cont.Frag + Sampling)
lm47<-lm(PDE ~ 1 + SL + δ18O + Sr + δ34S + Cont.Frag)
lm47s<-lm(PDE ~ 1 + SL + δ18O + Sr + δ34S + Cont.Frag + Sampling)
lm48<-lm(PDE ~ 1 + δ13C + Cont.Frag)
lm48s<-lm(PDE ~ 1 + δ13C + Cont.Frag + Sampling)
lm49<-lm(PDE ~ 1 + SL + δ13C + Cont.Frag)
lm49s<-lm(PDE ~ 1 + SL + δ13C + Cont.Frag + Sampling)
lm50<-lm(PDE ~ 1 + δ18O + δ13C + Cont.Frag)
lm50s<-lm(PDE ~ 1 + δ18O + δ13C + Cont.Frag + Sampling)
lm51<-lm(PDE ~ 1 + Sr + δ13C + Cont.Frag)
lm51s<-lm(PDE ~ 1 + Sr + δ13C + Cont.Frag + Sampling)
lm52<-lm(PDE ~ 1 + δ34S + δ13C + Cont.Frag)
lm52s<-lm(PDE ~ 1 + δ34S + δ13C + Cont.Frag + Sampling)
lm53<-lm(PDE ~ 1 + SL + δ18O + δ13C + Cont.Frag)
lm53s<-lm(PDE ~ 1 + SL + δ18O + δ13C + Cont.Frag + Sampling)
lm54<-lm(PDE ~ 1 + SL + Sr + δ13C + Cont.Frag)
lm54s<-lm(PDE ~ 1 + SL + Sr + δ13C + Cont.Frag + Sampling)
lm55<-lm(PDE ~ 1 + SL + δ34S + δ13C + Cont.Frag)
lm55s<-lm(PDE ~ 1 + SL + δ34S + δ13C + Cont.Frag + Sampling)
lm56<-lm(PDE ~ 1 + δ18O + Sr + δ13C + Cont.Frag)
lm56s<-lm(PDE ~ 1 + δ18O + Sr + δ13C + Cont.Frag + Sampling)
lm57<-lm(PDE ~ 1 + δ18O + δ34S + δ13C + Cont.Frag)
lm57s<-lm(PDE ~ 1 + δ18O + δ34S + δ13C + Cont.Frag + Sampling)
lm58<-lm(PDE ~ 1 + Sr + δ34S + δ13C + Cont.Frag)
lm58s<-lm(PDE ~ 1 + Sr + δ34S + δ13C + Cont.Frag + Sampling)
lm59<-lm(PDE ~ 1 + SL + δ18O + Sr + δ13C + Cont.Frag)
lm59s<-lm(PDE ~ 1 + SL + δ18O + Sr + δ13C + Cont.Frag + Sampling)
lm60<-lm(PDE ~ 1 + SL + δ18O + δ34S + δ13C + Cont.Frag)
lm60s<-lm(PDE ~ 1 + SL + δ18O + δ34S + δ13C + Cont.Frag + Sampling)
lm61<-lm(PDE ~ 1 + SL + Sr + δ34S + δ13C + Cont.Frag)
lm61s<-lm(PDE ~ 1 + SL + Sr + δ34S + δ13C + Cont.Frag + Sampling)
lm62<-lm(PDE ~ 1 + δ18O + Sr + δ34S + δ13C + Cont.Frag)
lm62s<-lm(PDE ~ 1 + δ18O + Sr + δ34S + δ13C + Cont.Frag + Sampling)
lm63<-lm(PDE ~ 1 + SL + δ18O + δ34S + δ13C + Sr + Cont.Frag)
lm63s<-lm(PDE ~ 1 + SL + δ18O + δ34S + δ13C + Sr + Cont.Frag + Sampling)

## Sheet: PDE.MED
PDE data: median
	R2	logLik	AIC	AICc	wAICc	Δ(AICc)	JB	BP
gls63.ar1	0.986088	-49.7366	115.473	126.673	0.496914	0	0.289266	0.351972		Model: 63.ar1
gls47.ar1	0.979803	-53.0916	120.183	127.82	0.280137	1.14628	0.328244	0.349043		Variable	Estimate	Std. Error	p-value
gls59.ar1	0.977204	-54.181	122.362	129.998	0.0942432	3.32508	0.191462	0.131762		(Intercept)	-22296.3	58499	0.7104
gls62.ar1	0.97593	-54.6706	123.341	130.978	0.0577563	4.30437	0.0746902	0.328259		Sea level	4.35	1.58	0.0186
gls43.ar1	0.965967	-57.7879	127.576	132.576	0.025975	5.90257	0.328026	0.0649986		δ18O	-37.569	13.12	0.0154
gls45.ar1	0.964789	-58.094	128.188	133.188	0.0191259	6.51474	0.063874	0.275555		δ34S	10.084	6.39	0.1427
gls56.ar1	0.958973	-59.47	130.94	135.94	0.00483084	9.26679	0.000443788	0.405459		δ13C	-2.986	9.56	0.7605
gls61.ar1	0.968182	-57.1821	128.364	136.001	0.00468676	9.32735	0.000953736	0.310192		87Sr/89Sr	31467.7	82904.2	0.7115
gls47s.ar1	0.974509	-55.1868	126.374	137.573	0.00213465	10.9002	0.456945	0.566203		Cont. Frag.	-675.139	475.9	0.1837
gls63s.ar1	0.982456	-51.8245	121.649	137.649	0.00205562	10.9757	0.442877	0.555968
gls31.ar1	0.96436	-58.203	130.406	138.042	0.0016886	11.369	0.0671606	0.545056
gls46.ar1	0.953747	-60.5491	133.098	138.098	0.00164214	11.4248	0.00399822	0.170395		Model: 47.ar1
gls54.ar1	0.953331	-60.6296	133.259	138.259	0.00151498	11.586	0.00053353	0.225455		Variable	Estimate	Std. Error	p-value
gls59s.ar1	0.972737	-55.7918	127.584	138.784	0.00116561	12.1103	0.336953	0.297087		(Intercept)	-30203.7	51078	0.5653
gls40.ar1	0.93886	-63.0604	136.121	139.198	0.000947618	12.5244	0.00167254	0.349026		Sea level	4.23	1.53	0.0169
gls62s.ar1	0.972066	-56.0103	128.021	139.221	0.000936822	12.5474	0.22124	0.546392		δ18O	-38.34	12.64	0.0104
gls58.ar1	0.948617	-61.4957	134.991	139.991	0.000637216	13.3181	3.28453e-11	0.781569		87Sr/89Sr	42678.5	72378.9	0.5664
gls27.ar1	0.947806	-61.6367	135.273	140.273	0.000553445	13.6	0.205874	0.570489		δ34S	10.45	6.18	0.1165
gls45s.ar1	0.959182	-59.424	132.848	140.484	0.000498014	13.8111	0.190374	0.416467		Cont. Frag.	-739.55	409.03	0.0957
gls43s.ar1	0.959155	-59.43	132.86	140.496	0.000495039	13.8231	0.44067	0.213236
gls30.ar1	0.945296	-62.0592	136.119	141.119	0.000362696	14.4452	0.0100081	0.404271
gls38.ar1	0.931371	-64.1003	138.201	141.278	0.000334979	14.6042	0.00198857	0.0982577		Model: 59.ar1
gls15.ar1	0.941942	-62.5949	137.19	142.19	0.000212289	15.5165	0.0349654	0.345129		Variable	Estimate	Std. Error	p-value
gls29.ar1	0.941016	-62.7373	137.475	142.475	0.0001841	15.8014	0.36752	0.275322		(Intercept)	-2010.4	62196.8	0.9747
gls56s.ar1	0.95296	-60.7009	135.402	143.038	0.000138891	16.365	0.0124523	0.616929		Sea level	4.8594	1.66	0.0128
gls42.ar1	0.923542	-65.0726	140.145	143.222	0.000126696	16.5488	2.75859e-08	0.702811		δ18O	-32.7619	13.84	0.0356
gls51.ar1	0.922712	-65.1698	140.339	143.416	0.00011496	16.7432	4.35207e-13	0.787459		87Sr/89Sr	2846.68	88162	0.9748
gls13.ar1	0.92098	-65.3692	140.738	143.815	9.41739e-05	17.1421	0.00829121	0.283009		δ13C	-5.6352	10.52	0.6019
gls22.ar1	0.917725	-65.7325	141.465	144.542	6.54865e-05	17.8687	0.552315	0.140864		Cont. Frag.	-417.696	496.16	0.4163
gls61s.ar1	0.961662	-58.8598	133.72	144.92	5.42183e-05	18.2463	0.0178964	0.221496
gls11.ar1	0.915568	-65.9654	141.931	145.008	5.18801e-05	18.3345	0.107316	0.368398
gls14.ar1	0.913498	-66.1834	142.367	145.444	4.17181e-05	18.7705	0.299893	0.172749
gls40s.ar1	0.929953	-64.2843	140.569	145.569	3.91922e-05	18.8954	0.0187384	0.579288
gls60.ar1	0.945472	-62.0303	138.06	145.697	3.6758e-05	19.0236	0.225287	0.389054
gls46s.ar1	0.9441	-62.254	138.508	146.144	2.93905e-05	19.471	0.0454246	0.136868
gls54s.ar1	0.94384	-62.2958	138.592	146.228	2.81862e-05	19.5547	0.0105337	0.196161
gls24.ar1	0.907801	-66.7575	143.515	146.592	2.34972e-05	19.9186	0.0113499	0.502842
gls35.ar1	0.883206	-68.8856	145.771	147.486	1.50299e-05	20.8123	8.33712e-10	0.675001
gls58s.ar1	0.939448	-62.9734	139.947	147.583	1.43139e-05	20.9099	8.96654e-09	0.632698
gls6.ar1	0.879589	-69.1601	146.32	148.035	1.1422e-05	21.3613	0.476157	0.0737965
gls44.ar1	0.919521	-65.5339	143.068	148.068	1.12339e-05	21.3945	0.271134	0.219419
gls31s.ar1	0.953937	-60.512	137.024	148.224	1.03893e-05	21.5508	0.0529317	0.799834
gls38s.ar1	0.917436	-65.764	143.528	148.528	8.92446e-06	21.8548	0.0243889	0.11227
gls30s.ar1	0.934514	-63.6784	141.357	148.993	7.07251e-06	22.3199	0.0106602	0.66589
gls27s.ar1	0.932654	-63.9305	141.861	149.497	5.49642e-06	22.8242	0.113924	0.889326
gls8.ar1	0.868402	-69.9596	147.919	149.634	5.1347e-06	22.9603	0.0121276	0.328959
gls53.ar1	0.911556	-66.3832	144.766	149.766	4.80495e-06	23.0931	0.316473	0.231043
gls42s.ar1	0.909446	-66.5954	145.191	150.191	3.88594e-06	23.5176	1.91771e-06	0.540287
gls51s.ar1	0.909193	-66.6205	145.241	150.241	3.78974e-06	23.5678	1.8579e-10	0.66148
gls26.ar1	0.883057	-68.8971	147.794	150.871	2.76568e-06	24.1978	0.000607402	0.708972
gls13s.ar1	0.904429	-67.0807	146.161	151.161	2.39183e-06	24.4882	0.00639895	0.577248
gls57.ar1	0.903561	-67.1621	146.324	151.324	2.20498e-06	24.6509	0.0218972	0.323649
gls15s.ar1	0.924375	-64.9739	143.948	151.584	1.93613e-06	24.911	0.0180533	0.611973
gls29s.ar1	0.923972	-65.0218	144.043	151.68	1.84571e-06	25.0066	0.64269	0.24761
gls55.ar1	0.895208	-67.9097	147.819	152.819	1.04407e-06	26.1461	0.163573	0.0939408
gls24s.ar1	0.894786	-67.9459	147.892	152.892	1.00697e-06	26.2185	0.0124224	0.749166
gls37.ar1	0.867262	-70.0373	150.075	153.151	8.84334e-07	26.4782	0.285361	0.108961
gls22s.ar1	0.892831	-68.1116	148.223	153.223	8.53191e-07	26.5499	0.635576	0.194236
gls10.ar1	0.834771	-72.0079	152.016	153.73	6.62172e-07	27.0568	0.000634603	0.623441
gls11s.ar1	0.889742	-68.3673	148.735	153.735	6.60683e-07	27.0613	0.0410429	0.727101
gls35s.ar1	0.862359	-70.3638	150.727	153.804	6.38004e-07	27.1312	8.52567e-08	0.564377
gls41.ar1	0.860667	-70.4737	150.947	154.024	5.71588e-07	27.351	0.023957	0.210208
gls14s.ar1	0.886412	-68.6351	149.27	154.27	5.05451e-07	27.597	0.474768	0.221979
gls39.ar1	0.854385	-70.8706	151.741	154.818	3.84332e-07	28.1448	0.178832	0.0471067
gls60s.ar1	0.931221	-64.1199	144.24	155.44	2.8164e-07	28.7666	0.225909	0.51797
gls8s.ar1	0.848797	-71.2095	152.419	155.496	2.73856e-07	28.8226	0.00721531	0.719459
gls49.ar1	0.848466	-71.2292	152.458	155.535	2.68521e-07	28.862	0.138734	0.0343046
gls6s.ar1	0.839923	-71.7228	153.446	156.523	1.63908e-07	29.8492	0.537979	0.157138
gls19.ar1	0.806085	-73.4487	154.897	156.612	1.56766e-07	29.9384	0.000114855	0.474096
gls50.ar1	0.836488	-71.9139	153.828	156.905	1.35398e-07	30.2314	0.00222834	0.481377
gls44s.ar1	0.896401	-67.8066	149.613	157.25	1.13949e-07	30.5764	0.344896	0.308702
gls26s.ar1	0.86042	-70.4896	152.979	157.979	7.91164e-08	31.306	0.00846045	0.439909
gls33s.ar1	0.788712	-74.2209	156.442	158.156	7.24236e-08	31.4828	0.151379	0.013342
gls53s.ar1	0.889993	-68.3468	150.694	158.33	6.63958e-08	31.6566	0.19776	0.627793
gls57s.ar1	0.884449	-68.7893	151.579	159.215	4.26511e-08	32.5417	0.0196021	0.475058
gls3.ar1	0.735149	-76.2544	158.509	159.309	4.06979e-08	32.6355	2.06655e-05	0.91931
gls28.ar1	0.849069	-71.1933	154.387	159.387	3.91435e-08	32.7134	0.0345009	0.398039
gls25.ar1	0.802433	-73.6166	157.233	160.31	2.46682e-08	33.6368	0.0100387	0.279094
gls34.ar1	0.761397	-75.3151	158.63	160.345	2.42481e-08	33.6712	0.0022498	0.325006
gls52.ar1	0.800174	-73.7189	157.438	160.515	2.22687e-08	33.8415	0.000342652	0.610807
gls10s.ar1	0.797247	-73.8498	157.7	160.776	1.95369e-08	34.1033	0.0134294	0.259648
gls37s.ar1	0.83279	-72.1151	156.23	161.23	1.55715e-08	34.557	0.189962	0.369297
gls41s.ar1	0.831487	-72.185	156.37	161.37	1.452e-08	34.6968	0.0231197	0.363406
gls21.ar1	0.784341	-74.4052	158.81	161.887	1.12113e-08	35.214	0.152869	0.360793
gls55s.ar1	0.860289	-70.4981	154.996	162.632	7.724e-09	35.9592	0.570596	0.0792414
gls19s.ar1	0.773184	-74.8591	159.718	162.795	7.12048e-09	36.1219	0.00266241	0.418994
gls9.ar1	0.715403	-76.9016	161.803	163.517	4.96224e-09	36.8441	0.0082491	0.165559
gls12.ar1	0.763791	-75.2244	160.449	163.526	4.94189e-09	36.8524	0.0148022	0.247923
gls50s.ar1	0.809662	-73.2811	158.562	163.562	4.85241e-09	36.8889	0.00207722	0.68868
gls36.ar1	0.711404	-77.0272	162.054	163.769	4.37659e-09	37.0953	0.000116111	0.468238
gls39s.ar1	0.797736	-73.8281	159.656	164.656	2.80806e-09	37.9829	0.558493	0.0472605
gls49s.ar1	0.797064	-73.8579	159.716	164.716	2.72545e-09	38.0426	0.471703	0.0562596
gls23.ar1	0.744849	-75.9186	161.837	164.914	2.46826e-09	38.2408	0.0262625	0.111542
gls48.ar1	0.684919	-77.8174	163.635	165.349	1.98587e-09	38.6757	2.83208e-05	0.476947
gls3s.ar1	0.671379	-78.196	164.392	166.106	1.35987e-09	39.4331	0.00257174	0.293786
gls5.ar1	0.663594	-78.4068	164.814	166.528	1.10147e-09	39.8546	0.0755818	0.208865
gls34s.ar1	0.71965	-76.7662	163.532	166.609	1.05746e-09	39.9361	0.00176194	0.628653
gls18.ar1	0.658983	-78.5293	165.059	166.773	9.74477e-10	40.0996	0.00767843	0.358376
gls28s.ar1	0.818091	-72.8735	159.747	167.383	7.18152e-10	40.71	0.0364312	0.736541
gls25s.ar1	0.764391	-75.2015	162.403	167.403	7.11135e-10	40.7296	0.0114456	0.530167
gls33.ar1	0.705264	-77.2166	164.433	167.51	6.74021e-10	40.8368	0.44691	0.0305883
gls7.ar1	0.643265	-78.9348	165.87	167.584	6.49586e-10	40.9107	0.0364174	0.0507883
gls17.ar1	0.641124	-78.9887	165.977	167.692	6.1554e-10	41.0184	0.0456647	0.0480261
gls52s.ar1	0.754509	-75.5712	163.142	168.142	4.91321e-10	41.4692	0.00699269	0.370596
gls21s.ar1	0.741278	-76.0437	164.087	169.087	3.06329e-10	42.4141	0.103933	0.811315
gls32.ar1	0.542473	-81.1744	168.349	169.149	2.97053e-10	42.4755	1.08044e-05	0.303146
gls2.ar1	0.518615	-81.6319	169.264	170.064	1.87996e-10	43.3905	0.0131784	0.134768
gls9s.ar1	0.657653	-78.5643	167.129	170.206	1.75132e-10	43.5323	0.00635408	0.450686
gls20.ar1	0.577494	-80.4577	168.915	170.63	1.41664e-10	43.9565	0.000540002	0.432299
gls1.ar1	0.4977	-82.0147	170.029	170.829	1.28207e-10	44.1561	0.0578966	0.0137171
gls12s.ar1	0.709697	-77.0802	166.161	171.161	1.08646e-10	44.4872	0.0111717	0.603896
gls36s.ar1	0.637571	-79.0773	168.155	171.232	1.04848e-10	44.5583	0.00614731	0.228371
gls48s.ar1	0.620136	-79.5002	169	172.077	6.86931e-11	45.4041	0.00105743	0.391573
gls18s.ar1	0.602391	-79.9111	169.822	172.899	4.55475e-11	46.2259	0.0100716	0.578822
gls5s.ar1	0.587729	-80.237	170.474	173.551	3.2879e-11	46.8777	0.0402555	0.672381
gls23s.ar1	0.663517	-78.4088	168.818	173.818	2.87745e-11	47.1444	0.267021	0.0988111
gls4.ar1	0.395553	-83.6807	173.361	174.161	2.42302e-11	47.4882	0.000493104	0.26225
gls2s.ar1	0.439497	-83.0014	174.003	175.717	1.11314e-11	49.0438	0.0143172	0.425921
gls32s.ar1	0.4381	-83.0238	174.048	175.762	1.08848e-11	49.0886	0.000993698	0.221756
gls17s.ar1	0.525856	-81.4955	172.991	176.068	9.34052e-12	49.3946	0.304739	0.0538443
gls7s.ar1	0.501798	-81.9409	173.882	176.959	5.98295e-12	50.2855	0.189172	0.0787972
gls16.ar1	0.291969	-85.1043	176.209	177.009	5.83597e-12	50.3353	0.00012143	0.225921
gls20s.ar1	0.482839	-82.2771	174.554	177.631	4.27499e-12	50.9578	0.0128447	0.26971
gls1s.ar1	0.298527	-85.0205	178.041	179.755	1.47793e-12	53.0821	0.22634	0.0354308
gls0.ar1	NA	-88.2117	180.423	180.673	9.33915e-13	54.0001	1.93187e-05	NA
gls4s.ar1	0.249	-85.6345	179.269	180.983	7.99826e-13	54.3101	0.0159052	0.122337
gls16s.ar1	0.156229	-86.6828	181.366	183.08	2.8037e-13	56.4067	0.00243504	0.251797
gls0s.ar1	-0.228956	-90.0672	186.134	186.934	4.0809e-14	60.2611	0.0017785	0.121761

## Sheet: PDE.BC
PDE data: most congruent chronological
	R2	logLik	AIC	AICc	wAICc	Δ(AICc)	JB	BP
gls63.ar1	0.987025	-49.0427	114.085	125.285	0.498181	0	0.305126	0.462962		Model: 63.ar1
gls47.ar1	0.981598	-52.1878	118.376	126.012	0.346431	0.72656	0.320034	0.52143		Variable	Estimate	Std. Error	p-value
gls59.ar1	0.977934	-53.8217	121.643	129.28	0.0676138	3.9943	0.252346	0.156462		(Intercept)	-38484.7	54826.6	0.4973
gls62.ar1	0.976391	-54.4301	122.86	130.497	0.0367938	5.21127	0.0753585	0.381368		Sea level	4.5	1.48	0.0113
gls43.ar1	0.967718	-57.2461	126.492	131.492	0.0223671	6.20674	0.37847	0.0823626		δ18O	-38.97	12.31	0.009
gls45.ar1	0.965562	-57.828	127.656	132.656	0.0124997	7.37052	0.0468169	0.280749		δ34S	10.54	6	0.1069
gls56.ar1	0.959534	-59.2796	130.559	135.559	0.00292725	10.2738	0.000486722	0.467176		δ13C	-1.17	8.98	0.8984
gls61.ar1	0.968147	-57.1257	128.251	135.888	0.00248388	10.6023	0.00483392	0.279139		87Sr/89Sr	54425.1	77699.6	0.4982
gls47s.ar1	0.976291	-54.4682	124.936	136.136	0.0021934	10.851	0.421859	0.68859		Cont. Frag.	-841.47	446.32	0.0861
gls63s.ar1	0.983312	-51.3079	120.616	136.616	0.00172597	11.3303	0.436505	0.662803
gls46.ar1	0.954216	-60.3909	132.782	137.782	0.000963461	12.4964	0.0135493	0.148843
gls54.ar1	0.953324	-60.5645	133.129	138.129	0.000809931	12.8435	0.00301423	0.201248		Model: 47.ar1
gls31.ar1	0.96359	-58.3289	130.658	138.294	0.000745668	13.0089	0.0413852	0.566188		Variable	Estimate	Std. Error	p-value
gls59s.ar1	0.973157	-55.5855	127.171	138.371	0.000717601	13.0856	0.377248	0.370841		(Intercept)	-41572.8	47458.2	0.3982
gls62s	0.972762	-55.717	127.434	138.634	0.000629155	13.3487	0.173537	0.611543		Sea level	4.46	1.42	0.0084
gls40.ar1	0.9401	-62.8096	135.619	138.696	0.000609954	13.4107	0.000872077	0.371028		δ18O	-39.23	11.74	0.0059
gls43s.ar1	0.960525	-59.0564	132.113	139.749	0.00036027	14.4637	0.466072	0.272417		87Sr/89Sr	58803.3	67249.8	0.3991
gls58.ar1	0.948206	-61.5009	135.002	140.002	0.000317505	14.7164	1.03375e-10	0.776274		δ34S	10.66	5.73	0.0873
gls45s.ar1	0.959732	-59.2355	132.471	140.107	0.000301183	14.822	0.144882	0.440242		Cont. Frag.	-867.05	379.98	0.0415
gls27.ar1	0.946418	-61.8064	135.613	140.613	0.000233915	15.3275	0.11465	0.555624
gls38.ar1	0.932079	-63.9405	137.881	140.958	0.000196855	15.6725	0.00747172	0.0857503
gls30.ar1	0.945236	-62.0027	136.005	141.005	0.000192234	15.72	0.00340787	0.414263		Model: 59.ar1
gls15.ar1	0.941337	-62.6217	137.243	142.243	0.000103518	16.958	0.0200909	0.350585		Variable	Estimate	Std. Error	p-value
gls56s	0.954128	-60.4081	134.816	142.452	9.32385e-05	17.1671	0.0120605	0.666442		(Intercept)	-15942.1	59742.8	0.7941
gls29.ar1	0.938837	-62.9973	137.994	142.994	7.11043e-05	17.7091	0.350338	0.244943		Sea level	4.947	1.62	0.0099
gls42.ar1	0.922908	-65.0804	140.161	143.238	6.29635e-05	17.9523	1.38237e-08	0.681081		δ18O	-33.889	13.34	0.0259
gls51.ar1	0.922696	-65.1051	140.21	143.287	6.14252e-05	18.0018	1.5663e-12	0.773912		87Sr/89Sr	22608.9	84683.9	0.794
gls13.ar1	0.921289	-65.2674	140.535	143.612	5.22219e-05	18.3264	0.00262022	0.288403		δ13C	-4.184	10.24	0.69
gls60.ar1	0.948046	-61.5286	137.057	144.694	3.04041e-05	19.4083	0.213104	0.426478		Cont. Frag.	-550.673	477.12	0.2709
gls40s	0.932225	-63.9212	139.842	144.842	2.82256e-05	19.557	0.0136257	0.569267
gls61s.ar1	0.961444	-58.8443	133.689	144.889	2.7579e-05	19.6033	0.044956	0.19141
gls11.ar1	0.914246	-66.0387	142.077	145.154	2.41485e-05	19.869	0.0520159	0.338525
gls22.ar1	0.913572	-66.1092	142.218	145.295	2.25047e-05	20.01	0.476184	0.123135
gls46s.ar1	0.944299	-62.1554	138.311	145.947	1.62463e-05	20.6617	0.0872071	0.11521
gls24.ar1	0.910208	-66.4529	142.906	145.983	1.59592e-05	20.6974	0.0028062	0.500236
gls14.ar1	0.91001	-66.4727	142.946	146.022	1.56458e-05	20.737	0.257627	0.155661
gls54s.ar1	0.943565	-62.2733	138.547	146.183	1.4439e-05	20.8976	0.0298865	0.162871
gls44.ar1	0.924388	-64.906	141.812	146.812	1.0543e-05	21.5265	0.285132	0.255989
gls35.ar1	0.883403	-68.804	145.608	147.322	8.16851e-06	22.0369	3.92257e-10	0.644589
gls58s.ar1	0.938797	-63.0032	140.006	147.643	6.95911e-06	22.3573	1.33731e-08	0.628915
gls38s.ar1	0.917678	-65.6711	143.342	148.342	4.90509e-06	23.0569	0.0528097	0.0910011
gls31s.ar1	0.95304	-60.619	137.238	148.438	4.67563e-06	23.1527	0.0468857	0.742783
gls6.ar1	0.872925	-69.5784	147.157	148.871	3.76534e-06	23.5858	0.370585	0.0660454
gls8.ar1	0.872634	-69.599	147.198	148.912	3.68853e-06	23.627	0.00303356	0.322334
gls30s.ar1	0.933605	-63.736	141.472	149.108	3.34424e-06	23.823	0.00629408	0.624693
gls53.ar1	0.913809	-66.0846	144.169	149.169	3.24414e-06	23.8837	0.275518	0.273549
gls27s.ar1	0.93128	-64.0458	142.092	149.728	2.45324e-06	24.4426	0.0964227	0.793008
gls51s.ar1	0.908764	-66.5965	145.193	150.193	1.94427e-06	24.9077	3.10815e-10	0.636732
gls42s.ar1	0.908473	-66.6251	145.25	150.25	1.88944e-06	24.9649	7.03988e-07	0.526067
gls26.ar1	0.883679	-68.7826	147.565	150.642	1.5532e-06	25.3568	0.000192266	0.690211
gls57.ar1	0.904337	-67.0229	146.046	151.046	1.26933e-06	25.7605	0.010185	0.320599
gls13s.ar1	0.903742	-67.0787	146.157	151.157	1.20046e-06	25.872	0.00338359	0.525278
gls15s.ar1	0.924456	-64.8979	143.796	151.432	1.04638e-06	26.1468	0.0165563	0.556901
gls29s.ar1	0.921547	-65.2379	144.476	152.112	7.44773e-07	26.8268	0.605747	0.224402
gls24s	0.897543	-67.6404	147.281	152.281	6.84547e-07	26.9954	0.00623721	0.68465
gls37.ar1	0.872309	-69.6219	149.244	152.321	6.70987e-07	27.0354	0.271618	0.121918
gls55.ar1	0.894826	-67.876	147.752	152.752	5.40868e-07	27.4666	0.199933	0.0855819
gls10.ar1	0.835185	-71.9189	151.838	153.552	3.62546e-07	28.2666	0.000248134	0.568973
gls11s.ar1	0.889826	-68.294	148.588	153.588	3.56093e-07	28.3026	0.0337599	0.612635
gls41.ar1	0.862567	-70.2836	150.567	153.644	3.46216e-07	28.3588	0.0106521	0.204515
gls35s.ar1	0.862006	-70.3203	150.641	153.718	3.33747e-07	28.4322	2.92275e-08	0.525339
gls22s.ar1	0.88824	-68.4226	148.845	153.845	3.13109e-07	28.5598	0.627449	0.161525
gls14s.ar1	0.88317	-68.8219	149.644	154.644	2.10033e-07	29.3584	0.390436	0.200895
gls8s	0.853488	-70.8594	151.719	154.796	1.94665e-07	29.5104	0.00372786	0.61858
gls39.ar1	0.852823	-70.9001	151.8	154.877	1.86897e-07	29.5918	0.211925	0.0427623
gls60s.ar1	0.932554	-63.8774	143.755	154.955	1.79783e-07	29.6694	0.246722	0.490544
gls49.ar1	0.846731	-71.2652	152.53	155.607	1.2974e-07	30.3219	0.163981	0.0316822
gls19.ar1	0.807507	-73.316	154.632	156.346	8.9662e-08	31.0609	1.87595e-05	0.505667
gls44s.ar1	0.900682	-67.3604	148.721	156.357	8.91764e-08	31.0717	0.400478	0.305633
gls50.ar1	0.839527	-71.6786	153.357	156.434	8.58113e-08	31.1486	0.000623336	0.474298
gls6s.ar1	0.833494	-72.0107	154.021	157.098	6.15586e-08	31.813	0.459063	0.131867
gls26s.ar1	0.860429	-70.4226	152.845	157.845	4.2376e-08	32.5598	0.00304981	0.453372
gls53s.ar1	0.890455	-68.2424	150.485	158.121	3.69129e-08	32.8358	0.221739	0.606067
gls33s.ar1	0.785103	-74.3068	156.614	158.328	3.32871e-08	33.0426	0.175006	0.0122778
gls57s.ar1	0.883711	-68.7801	151.56	159.197	2.15605e-08	33.9112	0.0138904	0.463361
gls3.ar1	0.732757	-76.2689	158.538	159.338	2.00917e-08	34.0523	3.25948e-06	0.945979
gls28.ar1	0.847254	-71.2344	154.469	159.469	1.88168e-08	34.1834	0.0174224	0.431428
gls34.ar1	0.767508	-75.0151	158.03	159.744	1.63936e-08	34.4592	0.000607086	0.31083
gls25.ar1	0.803184	-73.5159	157.032	160.109	1.3665e-08	34.8233	0.00334181	0.291708
gls52.ar1	0.798033	-73.7484	157.497	160.574	1.083e-08	35.2883	0.000106513	0.634415
gls10s.ar1	0.79727	-73.7823	157.565	160.642	1.04687e-08	35.3562	0.00591172	0.27156
gls37s.ar1	0.836581	-71.8423	155.685	160.685	1.02456e-08	35.3993	0.240477	0.340419
gls41s.ar1	0.831629	-72.111	156.222	161.222	7.83197e-09	35.9365	0.0143788	0.344953
gls21.ar1	0.780962	-74.4787	158.957	162.034	5.2176e-09	36.7489	0.0690382	0.351668
gls19s.ar1	0.774034	-74.7589	159.518	162.595	3.94253e-09	37.3093	0.000788948	0.41792
gls55s.ar1	0.859154	-70.5045	155.009	162.645	3.84403e-09	37.3599	0.617657	0.0717518
gls50s	0.813474	-73.0326	158.065	163.065	3.11609e-09	37.7798	0.00130229	0.631166
gls9.ar1	0.717904	-76.7557	161.511	163.226	2.8759e-09	37.9402	0.00249932	0.173354
gls12.ar1	0.763383	-75.1734	160.347	163.424	2.60459e-09	38.1384	0.00650599	0.268452
gls36.ar1	0.707329	-77.0869	162.174	163.888	2.065e-09	38.6027	3.18897e-05	0.487328
gls39s.ar1	0.796617	-73.8112	159.623	164.623	1.43035e-09	39.3371	0.609281	0.0412712
gls49s.ar1	0.794162	-73.9192	159.839	164.839	1.28394e-09	39.5531	0.520645	0.0493023
gls48.ar1	0.681876	-77.8374	163.675	165.389	9.7494e-10	40.1037	6.06636e-06	0.528948
gls23.ar1	0.732674	-76.2716	162.543	165.62	8.68531e-10	40.3349	0.0153713	0.11848
gls18.ar1	0.672333	-78.1034	164.207	165.921	7.4722e-10	40.6357	0.00176658	0.354016
gls34s	0.727235	-76.4529	162.906	165.983	7.2453e-10	40.6974	0.00100282	0.54516
gls3s.ar1	0.670203	-78.1617	164.323	166.038	7.04883e-10	40.7524	0.000971799	0.282802
gls5.ar1	0.661709	-78.3906	164.781	166.495	5.6069e-10	41.2101	0.0282401	0.194757
gls25s.ar1	0.762022	-75.225	162.45	167.45	3.47892e-10	42.1647	0.00646778	0.492932
gls33.ar1	0.702152	-77.2447	164.489	167.566	3.28248e-10	42.2809	0.500108	0.0256517
gls28s.ar1	0.813581	-73.0274	160.055	167.691	3.08382e-10	42.4058	0.0288448	0.664331
gls52s.ar1	0.751849	-75.6018	163.204	168.204	2.38684e-10	42.9182	0.00324542	0.387699
gls17.ar1	0.622369	-79.3807	166.761	168.476	2.08322e-10	43.1903	0.0226396	0.0524507
gls7.ar1	0.621294	-79.4063	166.813	168.527	2.03057e-10	43.2415	0.0195192	0.0558796
gls2.ar1	0.539515	-81.166	168.332	169.132	1.50047e-10	43.8466	0.00324011	0.134007
gls32.ar1	0.536763	-81.2196	168.439	169.239	1.42213e-10	43.9538	2.11855e-06	0.347637
gls21s.ar1	0.734681	-76.2038	164.408	169.408	1.30723e-10	44.1223	0.0770393	0.657042
gls9s.ar1	0.656608	-78.5253	167.051	170.127	9.12109e-11	44.8421	0.00332108	0.401768
gls20.ar1	0.57695	-80.4028	168.806	170.52	7.49583e-11	45.2346	0.000140915	0.465426
gls12s.ar1	0.707668	-77.0764	166.153	171.153	5.46239e-11	45.8675	0.00795234	0.54253
gls36s.ar1	0.633102	-79.1212	168.242	171.319	5.02623e-11	46.0339	0.00276227	0.236007
gls1.ar1	0.464984	-82.5161	171.032	171.832	3.88928e-11	46.5468	0.0271067	0.0156665
gls48s.ar1	0.617115	-79.505	169.01	172.087	3.42404e-11	46.8016	0.000416513	0.395275
gls18s	0.615594	-79.5407	169.082	172.158	3.30403e-11	46.873	0.00376301	0.531759
gls5s.ar1	0.584212	-80.247	170.494	173.571	1.63044e-11	48.2856	0.025237	0.523709
gls4.ar1	0.395023	-83.6222	173.244	174.044	1.28683e-11	48.7589	0.000147768	0.264008
gls23s.ar1	0.649569	-78.7079	169.416	174.416	1.06868e-11	49.1304	0.197983	0.0942678
gls2s	0.459471	-82.6084	173.217	174.931	8.25982e-12	49.6457	0.00567925	0.358156
gls32s.ar1	0.433616	-83.0289	174.058	175.772	5.42427e-12	50.4867	0.000379743	0.218343
gls16.ar1	0.302598	-84.9017	175.803	176.603	3.57952e-12	51.318	2.13443e-05	0.256098
gls17s.ar1	0.504657	-81.8227	173.645	176.722	3.37288e-12	51.4369	0.222294	0.0488304
gls7s.ar1	0.481387	-82.2359	174.472	177.549	2.23132e-12	52.2633	0.12841	0.0771431
gls20s.ar1	0.480862	-82.245	174.49	177.567	2.2111e-12	52.2815	0.00511813	0.285505
gls1s.ar1	0.267703	-85.3411	178.682	180.397	5.37222e-13	55.1111	0.149555	0.0330981
gls0.ar1	NA	-88.1452	180.291	180.541	4.99915e-13	55.2551	2.99354e-06	NA
gls4s.ar1	0.2469	-85.5932	179.186	180.901	4.17511e-13	55.6153	0.00717073	0.131157
gls16s.ar1	0.168934	-86.4798	180.96	182.674	1.72038e-13	57.3885	0.000762856	0.249179
gls0s.ar1	-0.22186	-89.9486	185.897	186.697	2.30132e-14	61.4118	0.000617015	0.116749

## Sheet: PDE.BR
PDE data: least congruent chronological
	R2	logLik	AIC	AICc	wAICc	Δ(AICc)	JB	BP
gls63.ar1	0.987626	-50.1354	116.271	127.471	0.508161	0	0.266475	0.421339		Model: 63.ar1
gls47.ar1	0.982401	-53.306	120.612	128.248	0.344487	0.777486	0.257908	0.45577		Variable	Estimate	Std. Error	p-value
gls62.ar1	0.978208	-55.2292	124.458	132.095	0.0503414	4.62394	0.0540021	0.405593		(Intercept)	-39757.1	60351.7	0.5236
gls59.ar1	0.978137	-55.2585	124.517	132.153	0.0488889	4.6825	0.182756	0.142218		Sea level	4.64	1.63	0.0162
gls43.ar1	0.968062	-58.6694	129.339	134.339	0.0163933	6.86785	0.269701	0.073964		δ18O	-42.74	13.57	0.0093
gls45.ar1	0.967896	-58.7163	129.433	134.433	0.0156421	6.96167	0.0287224	0.299663		δ34S	12.78	6.64	0.0804
gls56.ar1	0.960825	-60.5076	133.015	138.015	0.00260816	10.5443	0.000313061	0.455277		δ13C	0.46	9.94	0.9642
gls61.ar1	0.969649	-58.2107	130.421	138.058	0.00255313	10.587	0.00211756	0.270615		87Sr/89Sr	59177	85529.4	0.5248
gls47s.ar1	0.977479	-55.5252	127.05	138.25	0.00231869	10.7796	0.359301	0.701754		Cont. Frag.	-876.45	491.96	0.1024
gls63s.ar1	0.984174	-52.3504	122.701	138.701	0.0018511	11.23	0.393412	0.703271
gls46.ar1	0.956382	-61.4745	134.949	139.949	0.000991749	12.4782	0.00531833	0.140063
gls31.ar1	0.965748	-59.299	132.598	140.234	0.00085988	12.7635	0.0274245	0.625548		Model: 47.ar1
gls62s.ar1	0.974545	-56.6274	129.255	140.455	0.000770157	12.9839	0.151402	0.625502		Variable	Estimate	Std. Error	p-value
gls54.ar1	0.953969	-61.9591	135.918	140.918	0.000610844	13.4474	0.00109727	0.201635		(Intercept)	-38574.6	51981.9	0.4723
gls59s.ar1	0.973772	-56.8968	129.794	140.994	0.000588275	13.5227	0.310061	0.341536		Sea level	4.66	1.55	0.0112
gls40.ar1	0.941502	-64.1162	138.232	141.309	0.000502341	13.8386	0.00055658	0.359404		δ18O	-42.62	12.87	0.0062
gls45s.ar1	0.962386	-60.1418	134.284	141.92	0.000370203	14.449	0.121467	0.415665		87Sr/89Sr	54500.6	73659.8	0.4736
gls58.ar1	0.95133	-62.4609	136.922	141.922	0.000369836	14.451	7.97615e-11	0.794799		δ34S	12.72	6.29	0.066
gls43s.ar1	0.961464	-60.3596	134.719	142.356	0.000297743	14.8846	0.376152	0.243592		Cont. Frag.	-866.95	416.29	0.0594
gls30.ar1	0.949217	-62.8434	137.687	142.687	0.000252295	15.2159	0.00232007	0.489029
gls27.ar1	0.948374	-62.9915	137.983	142.983	0.000217568	15.5121	0.151743	0.6327
gls38.ar1	0.933338	-65.292	140.584	143.661	0.000155019	16.19	0.00253924	0.0832057		Model: 59.ar1
gls15.ar1	0.94633	-63.3409	138.682	143.682	0.000153398	16.211	0.0120407	0.412186		Variable	Estimate	Std. Error	p-value
gls29.ar1	0.942394	-63.9779	139.956	144.956	8.11323e-05	17.4849	0.383053	0.223758		(Intercept)	-11794.6	67200.5	0.8636
gls56s	0.954994	-61.7566	137.513	145.149	7.36438e-05	17.6786	0.00914077	0.590374		Sea level	5.214	1.82	0.0143
gls42.ar1	0.927418	-66.0578	142.116	145.192	7.20765e-05	17.7217	7.38902e-09	0.702919		δ18O	-36.401	15.01	0.0321
gls13.ar1	0.927024	-66.1064	142.213	145.29	6.86541e-05	17.8189	0.0018229	0.347375		87Sr/89Sr	16705.6	95255.1	0.8637
gls51.ar1	0.925095	-66.3412	142.683	145.759	5.42867e-05	18.2885	7.1243e-13	0.794736		δ13C	-3.191	11.55	0.787
gls61s.ar1	0.963661	-59.8312	135.662	146.863	3.1273e-05	19.3916	0.0208372	0.206243		Cont. Frag.	-520.658	536.82	0.3512
gls60.ar1	0.95022	-62.6638	139.328	146.964	2.97248e-05	19.4931	0.164876	0.452428
gls11.ar1	0.91962	-66.9762	143.952	147.029	2.87688e-05	19.5585	0.0770373	0.435391
gls22.ar1	0.917556	-67.2044	144.409	147.486	2.28998e-05	20.0149	0.572375	0.107047
gls40s	0.932666	-65.3823	142.765	147.765	1.99192e-05	20.2937	0.0105392	0.491556
gls14.ar1	0.916157	-67.3558	144.712	147.789	1.96817e-05	20.3177	0.318777	0.138794
gls46s.ar1	0.947467	-63.1483	140.297	147.933	1.83108e-05	20.4621	0.0389552	0.119788
gls24.ar1	0.911862	-67.8054	145.611	148.688	1.25552e-05	21.2168	0.005693	0.550596
gls54s.ar1	0.945091	-63.5463	141.093	148.729	1.22984e-05	21.2582	0.0111701	0.188611
gls44.ar1	0.92841	-65.9339	143.868	148.868	1.14745e-05	21.3968	0.18798	0.272981
gls58s.ar1	0.942925	-63.8945	141.789	149.425	8.68206e-06	21.9546	7.76593e-09	0.659019
gls35.ar1	0.886721	-70.0639	148.128	149.842	7.04905e-06	22.3713	1.6232e-10	0.665457
gls31s.ar1	0.956263	-61.4991	138.998	150.198	5.89931e-06	22.7274	0.0294868	0.814985
gls30s.ar1	0.938683	-64.5398	143.08	150.716	4.55379e-06	23.2452	0.00425818	0.696511
gls38s.ar1	0.920198	-66.9112	145.822	150.822	4.3178e-06	23.3516	0.0193796	0.101211
gls6.ar1	0.880212	-70.5668	149.133	150.848	4.26339e-06	23.377	0.508128	0.0553811
gls8.ar1	0.873378	-71.0662	150.132	151.847	2.58741e-06	24.3758	0.00891726	0.372542
gls27s.ar1	0.934207	-65.174	144.348	151.984	2.4153e-06	24.5135	0.10983	0.887991
gls42s.ar1	0.914468	-67.5353	147.071	152.071	2.3132e-06	24.5998	3.27623e-07	0.563547
gls53.ar1	0.914377	-67.5448	147.09	152.09	2.29132e-06	24.6188	0.268212	0.270729
gls51s.ar1	0.912349	-67.7556	147.511	152.511	1.85592e-06	25.0403	1.00911e-10	0.671607
gls26.ar1	0.890011	-69.7987	149.597	152.674	1.71047e-06	25.2036	0.000355374	0.712466
gls57.ar1	0.911279	-67.8648	147.73	152.73	1.66395e-06	25.2587	0.00758294	0.400332
gls13s.ar1	0.91126	-67.8667	147.733	152.733	1.66082e-06	25.2625	0.00219935	0.604818
gls15s.ar1	0.931133	-65.5848	145.17	152.806	1.60153e-06	25.3352	0.00897681	0.644887
gls29s.ar1	0.926724	-66.1433	146.287	153.923	9.16192e-07	26.4522	0.603135	0.231463
gls55.ar1	0.901287	-68.8252	149.65	154.65	6.36838e-07	27.1796	0.187174	0.0779218
gls37.ar1	0.8744	-70.9932	151.987	155.063	5.18033e-07	27.5925	0.236746	0.134435
gls24s	0.898374	-69.087	150.174	155.174	4.90177e-07	27.7031	0.011183	0.720152
gls41.ar1	0.871969	-71.1657	152.332	155.408	4.35956e-07	27.9375	0.00754718	0.258539
gls11s.ar1	0.896663	-69.2372	150.474	155.474	4.21793e-07	28.0036	0.0421608	0.756901
gls10.ar1	0.841601	-73.0813	154.163	155.877	3.44903e-07	28.4061	0.000595713	0.586834
gls22s.ar1	0.894139	-69.4544	150.909	155.909	3.39448e-07	28.438	0.612877	0.171227
gls35s.ar1	0.867064	-71.5041	153.008	156.085	3.10818e-07	28.6142	9.61681e-09	0.568891
gls14s.ar1	0.892047	-69.6306	151.261	156.261	2.84623e-07	28.7903	0.461498	0.194702
gls39.ar1	0.860663	-71.9274	153.855	156.932	2.03553e-07	29.4608	0.214874	0.0390674
gls60s.ar1	0.935988	-64.927	145.854	157.054	1.91475e-07	29.5831	0.16904	0.593955
gls8s	0.853611	-72.3717	154.744	157.82	1.30523e-07	30.3495	0.0088547	0.695148
gls49.ar1	0.852246	-72.4552	154.91	157.987	1.20068e-07	30.5165	0.148436	0.0277881
gls44s.ar1	0.90674	-68.3138	150.628	158.264	1.04558e-07	30.7931	0.224976	0.3614
gls19.ar1	0.812591	-74.5949	157.19	158.904	7.59193e-08	31.4333	7.23101e-05	0.478188
gls6s.ar1	0.844162	-72.9346	155.869	158.946	7.43398e-08	31.4753	0.536403	0.128543
gls50.ar1	0.843032	-72.9996	155.999	159.076	6.96606e-08	31.6054	0.00100021	0.541479
gls26s.ar1	0.868747	-71.3894	154.779	159.779	4.90242e-08	32.308	0.00508858	0.4881
gls57s.ar1	0.892667	-69.5787	153.157	160.794	2.95141e-08	33.3229	0.00970666	0.557616
gls53s.ar1	0.892315	-69.6082	153.216	160.853	2.86568e-08	33.3818	0.192106	0.66633
gls33s.ar1	0.791092	-75.5723	159.145	160.859	2.85673e-08	33.3881	0.171472	0.0107139
gls28.ar1	0.855688	-72.2431	156.486	161.486	2.08775e-08	34.0153	0.0110297	0.473939
gls25.ar1	0.81576	-74.4414	158.883	161.96	1.64751e-08	34.4889	0.0024456	0.351603
gls3.ar1	0.737346	-77.6328	161.266	162.066	1.56258e-08	34.5948	2.05408e-05	0.920489
gls52.ar1	0.810245	-74.7069	159.414	162.491	1.2634e-08	35.0198	0.000249188	0.606213
gls34.ar1	0.770686	-76.4111	160.822	162.537	1.23476e-08	35.0657	0.000940421	0.361007
gls10s.ar1	0.806241	-74.8948	159.79	162.867	1.04695e-08	35.3957	0.011916	0.285711
gls41s.ar1	0.844105	-72.9379	157.876	162.876	1.04211e-08	35.405	0.00944125	0.423628
gls37s.ar1	0.841054	-73.1124	158.225	163.225	8.7527e-09	35.7539	0.166969	0.407307
gls21.ar1	0.788208	-75.6957	161.391	164.468	4.70003e-09	36.9975	0.107912	0.416683
gls55s.ar1	0.867968	-71.4427	156.885	164.522	4.57633e-09	37.0508	0.557525	0.0735762
gls9.ar1	0.736153	-77.6736	163.347	165.061	3.49372e-09	37.5907	0.00184568	0.209362
gls19s.ar1	0.780528	-76.0163	162.033	165.109	3.41092e-09	37.6387	0.00200005	0.447273
gls12.ar1	0.780503	-76.0173	162.035	165.112	3.40739e-09	37.6407	0.00410301	0.305158
gls50s	0.816265	-74.4168	160.833	165.833	2.37495e-09	38.3627	0.00186101	0.694426
gls36.ar1	0.7213	-78.1665	164.333	166.047	2.13416e-09	38.5765	8.51193e-05	0.447309
gls39s.ar1	0.807789	-74.8226	161.645	166.645	1.58266e-09	39.1744	0.556808	0.0399103
gls49s.ar1	0.802069	-75.0865	162.173	167.173	1.21555e-09	39.7022	0.442966	0.0521317
gls23.ar1	0.749244	-77.2156	164.431	167.508	1.02807e-09	40.0373	0.0179859	0.109868
gls48.ar1	0.691293	-79.0868	166.174	167.888	8.50244e-10	40.4171	1.38715e-05	0.476716
gls5.ar1	0.67858	-79.45	166.9	168.614	5.91296e-10	41.1435	0.0528065	0.252275
gls3s.ar1	0.675039	-79.5486	167.097	168.812	5.35774e-10	41.3407	0.00271687	0.312652
gls34s	0.72948	-77.8984	165.797	168.874	5.19373e-10	41.4029	0.00130579	0.621807
gls18.ar1	0.672033	-79.6315	167.263	168.977	4.93167e-10	41.5064	0.00360916	0.419974
gls25s.ar1	0.777961	-76.121	164.242	169.242	4.3204e-10	41.7711	0.00424991	0.559458
gls28s.ar1	0.824825	-73.9874	161.975	169.611	3.59228e-10	42.1402	0.01849	0.718091
gls33.ar1	0.711654	-78.4728	166.946	170.022	2.92446e-10	42.5516	0.431382	0.0260708
gls52s.ar1	0.767441	-76.5376	165.075	170.075	2.8484e-10	42.6043	0.00614621	0.398997
gls7.ar1	0.647478	-80.2813	168.563	170.277	2.57508e-10	42.806	0.0322536	0.0495196
gls17.ar1	0.639529	-80.482	168.964	170.678	2.10687e-10	43.2074	0.0399854	0.0432963
gls21s.ar1	0.743965	-77.4031	166.806	171.806	1.19867e-10	44.3354	0.0984277	0.771476
gls9s.ar1	0.68024	-79.4034	168.807	171.884	1.15308e-10	44.4129	0.00215688	0.461936
gls32.ar1	0.544496	-82.5879	171.176	171.976	1.1012e-10	44.505	5.47368e-06	0.305152
gls2.ar1	0.530241	-82.8653	171.731	172.53	8.34477e-11	45.0597	0.0127203	0.158499
gls20.ar1	0.598451	-81.4532	170.906	172.621	7.97661e-11	45.1499	0.000299657	0.423131
gls12s.ar1	0.729827	-77.8868	167.774	172.774	7.38956e-11	45.3028	0.00445737	0.591908
gls36s.ar1	0.651887	-80.168	170.336	173.413	5.36784e-11	45.9421	0.00532222	0.228098
gls1.ar1	0.492185	-83.5663	173.133	173.933	4.13945e-11	46.4618	0.060143	0.0119181
gls48s.ar1	0.629305	-80.7337	171.467	174.544	3.04881e-11	47.0735	0.000782529	0.401689
gls18s.ar1	0.613468	-81.1102	172.22	175.297	2.09222e-11	47.8265	0.0068954	0.596733
gls5s.ar1	0.605632	-81.2909	172.582	175.659	1.74646e-11	48.1878	0.0370433	0.645729
gls23s.ar1	0.671192	-79.6546	171.309	176.309	1.26155e-11	48.8383	0.207292	0.0942977
gls4.ar1	0.414886	-84.8415	175.683	176.483	1.15646e-11	49.0122	0.000395412	0.240664
gls2s.ar1	0.447215	-84.33	176.66	178.374	4.49215e-12	50.9035	0.0204962	0.419313
gls32s.ar1	0.444793	-84.3693	176.739	178.453	4.31888e-12	50.9821	0.000726697	0.212935
gls17s.ar1	0.527655	-82.9147	175.829	178.906	3.44302e-12	51.4354	0.264427	0.0502418
gls7s.ar1	0.516364	-83.1273	176.255	179.332	2.78362e-12	51.8606	0.1699	0.0674462
gls16.ar1	0.30941	-86.3332	178.666	179.466	2.60201e-12	51.9956	7.13407e-05	0.227382
gls20s.ar1	0.508485	-83.2727	176.545	179.622	2.40685e-12	52.1515	0.00873523	0.285799
gls1s.ar1	0.306056	-86.3768	180.754	182.468	5.80156e-13	54.997	0.220865	0.0285623
gls4s.ar1	0.274876	-86.7724	181.545	183.259	3.90619e-13	55.7882	0.0138647	0.125636
gls0.ar1	NA	-89.6651	183.33	183.58	3.32674e-13	56.1093	2.06823e-05	NA
gls16s.ar1	0.178858	-87.8915	183.783	185.497	1.27555e-13	58.0265	0.0018767	0.2704
gls0s.ar1	-0.224919	-91.491	188.982	189.782	1.49736e-14	62.3111	0.00220577	0.135523

## Sheet: PDE.WC
PDE data: most congruent reverse-chronological
	R2	logLik	AIC	AICc	wAICc	Δ(AICc)	JB	BP
gls63.ar1	0.984262	-49.7313	115.463	126.662	0.470375	0	0.319809	0.349478		Model: 63.ar1
gls47.ar1	0.976164	-53.4675	120.935	128.571	0.181108	1.90888	0.387437	0.338782		Variable	Estimate	Std. Error	p-value
gls59.ar1	0.976044	-53.5126	121.025	128.662	0.173118	1.99911	0.254253	0.146673		(Intercept)	1056.17	58691.8	0.986
gls62.ar1	0.973542	-54.4069	122.814	130.45	0.0707879	3.78768	0.122724	0.273569		Sea level	4.1146	1.57	0.0241
gls43.ar1	0.962743	-57.4874	126.975	131.975	0.0330287	5.31231	0.433053	0.0753231		δ18O	-31.6902	13.14	0.0345
gls45.ar1	0.960975	-57.9047	127.809	132.809	0.0217608	6.14684	0.154905	0.250076		δ34S	7.6292	6.37	0.2565
gls61.ar1	0.96758	-56.2358	126.472	134.108	0.0113681	7.44543	0.00142062	0.380077		δ13C	-6.2907	9.53	0.5228
gls56.ar1	0.957283	-58.7182	129.436	134.436	0.00964675	7.77382	0.00254611	0.356554		87Sr/89Sr	-1599.65	83177.8	0.985
gls54.ar1	0.953949	-59.3945	130.789	135.789	0.00490527	9.12644	0.00105697	0.276944		Cont. Frag.	-442.624	476.84	0.3732
gls31.ar1	0.962996	-57.426	128.852	136.488	0.00345782	9.82578	0.199428	0.470272
gls46.ar1	0.95122	-59.9126	131.825	136.825	0.00292168	10.1627	0.00741311	0.224197
gls63s.ar1	0.980561	-51.6324	121.265	137.265	0.00234532	10.6022	0.460261	0.389876		Model: 47.ar1
gls59s.ar1	0.97154	-55.0633	126.127	137.327	0.00227383	10.6641	0.389582	0.288125		Variable	Estimate	Std. Error	p-value
gls40.ar1	0.935813	-62.383	134.766	137.843	0.0017566	11.1803	0.0135946	0.329986		(Intercept)	-16011.6	52468.2	0.7655
gls47s.ar1	0.970533	-55.3763	126.752	137.952	0.00166284	11.29	0.521933	0.430071		Sea level	3.853	1.58	0.0308
gls58.ar1	0.947322	-60.6045	133.209	138.209	0.00146273	11.5465	3.17487e-10	0.768695		δ18O	-33.456	13.02	0.0245
gls27.ar1	0.9473	-60.6083	133.217	138.217	0.00145711	11.5542	0.357157	0.526661		87Sr/89Sr	22599.6	74348.4	0.7664
gls62s.ar1	0.96942	-55.71	127.42	138.62	0.00119099	11.9575	0.341956	0.425064		δ34S	8.399	6.37	0.2122
gls38.ar1	0.929617	-63.2123	136.425	139.501	0.000766456	12.839	0.00466358	0.128958		Cont. Frag.	-581.457	420.39	0.1918
gls43s.ar1	0.955634	-59.059	132.118	139.754	0.000675448	13.0918	0.523857	0.219888
gls45s.ar1	0.955188	-59.149	132.298	139.934	0.000617302	13.2719	0.339195	0.363844
gls30.ar1	0.940853	-61.647	135.294	140.294	0.000515702	13.6315	0.0721606	0.318052		Model: 59.ar1
gls29.ar1	0.939594	-61.8365	135.673	140.673	0.00042667	14.0106	0.359684	0.37508		Variable	Estimate	Std. Error	p-value
gls51.ar1	0.92253	-64.0758	138.152	141.229	0.000323194	14.5661	1.60154e-11	0.770901		(Intercept)	15099.8	59497	0.804
gls15.ar1	0.937687	-62.1163	136.233	141.233	0.000322543	14.5701	0.157375	0.295213		Sea level	4.551	1.57	0.0133
gls56s.ar1	0.951252	-59.9067	133.813	141.45	0.00028936	14.7872	0.033997	0.645441		δ18O	-28.087	13.18	0.0544
gls42.ar1	0.920895	-64.2638	138.528	141.605	0.000267819	14.9419	5.9896e-07	0.696841		87Sr/89Sr	-21402.3	84335	0.804
gls22.ar1	0.917475	-64.6447	139.289	142.366	0.000182987	15.7037	0.54736	0.220486		δ13C	-8.094	9.91	0.43
gls61s.ar1	0.960845	-57.9346	131.869	143.069	0.000128762	16.4066	0.0296916	0.248317		Cont. Frag.	-266.479	474.21	0.5845
gls13.ar1	0.913985	-65.0175	140.035	143.112	0.000126043	16.4493	0.066161	0.220878
gls11.ar1	0.911604	-65.2632	140.526	143.603	9.85794e-05	16.9408	0.259226	0.32539
gls54s.ar1	0.944304	-61.106	136.212	143.848	8.72136e-05	17.1859	0.0221154	0.217778
gls14.ar1	0.909977	-65.4273	140.855	143.932	8.366e-05	17.2691	0.314302	0.237314
gls40s.ar1	0.927075	-63.5317	139.064	144.064	7.83214e-05	17.4009	0.0593677	0.658845
gls46s.ar1	0.941132	-61.6044	137.209	144.845	5.29827e-05	18.1826	0.0843882	0.164884
gls24.ar1	0.902968	-66.1022	142.204	145.281	4.26021e-05	18.6188	0.0605402	0.449558
gls35.ar1	0.881916	-67.8693	143.739	145.453	3.90979e-05	18.7904	4.719e-08	0.666706
gls60.ar1	0.938779	-61.9571	137.914	145.551	3.7234e-05	18.8881	0.319886	0.373492
gls58s.ar1	0.937762	-62.1055	138.211	145.847	3.20993e-05	19.1849	7.87295e-08	0.600213
gls6.ar1	0.877172	-68.2238	144.448	146.162	2.74284e-05	19.4994	0.493954	0.113411
gls31s.ar1	0.952454	-59.6821	135.364	146.564	2.24319e-05	19.9016	0.156958	0.794098
gls38s.ar1	0.915278	-64.8812	141.762	146.762	2.03152e-05	20.0998	0.0550189	0.135027
gls27s.ar1	0.932288	-62.8641	139.728	147.365	1.50333e-05	20.702	0.194487	0.913427
gls30s.ar1	0.930464	-63.1034	140.207	147.843	1.18337e-05	21.1807	0.0603578	0.618844
gls51s.ar1	0.908766	-65.5476	143.095	148.095	1.04323e-05	21.4328	4.95771e-09	0.645354
gls8.ar1	0.861601	-69.2981	146.596	148.31	9.36845e-06	21.6479	0.0594869	0.286121
gls44.ar1	0.907166	-65.7041	143.408	148.408	8.92115e-06	21.7457	0.381311	0.227575
gls53.ar1	0.906807	-65.7388	143.478	148.478	8.61683e-06	21.8151	0.454924	0.218855
gls42s.ar1	0.906131	-65.8038	143.608	148.608	8.07442e-06	21.9452	2.92603e-05	0.501313
gls26.ar1	0.876526	-68.2711	146.542	149.619	4.86961e-06	22.9565	0.00191084	0.710499
gls29s.ar1	0.922419	-64.0887	142.177	149.814	4.41791e-06	23.1512	0.719664	0.280337
gls13s.ar1	0.897328	-66.6106	145.221	150.221	3.60348e-06	23.5588	0.044873	0.536883
gls57.ar1	0.894982	-66.814	145.628	150.628	2.94041e-06	23.9655	0.102342	0.265362
gls15s.ar1	0.918401	-64.5431	143.086	150.723	2.80449e-06	24.0601	0.086574	0.58961
gls22s.ar1	0.892841	-66.9956	145.991	150.991	2.45211e-06	24.3287	0.694095	0.244333
gls24s.ar1	0.89155	-67.1034	146.207	151.207	2.20155e-06	24.5442	0.0390198	0.7806
gls35s.ar1	0.860576	-69.3644	148.729	151.806	1.63175e-06	25.1433	2.95182e-06	0.543274
gls55.ar1	0.887735	-67.4145	146.829	151.829	1.61289e-06	25.1665	0.202507	0.118729
gls10.ar1	0.828168	-71.2455	150.491	152.205	1.33636e-06	25.5427	0.00149914	0.675729
gls37.ar1	0.856459	-69.6264	149.253	152.33	1.25574e-06	25.6671	0.443235	0.103759
gls11s.ar1	0.883796	-67.7249	147.45	152.45	1.18255e-06	25.7872	0.100486	0.724004
gls14s.ar1	0.881038	-67.936	147.872	152.872	9.57433e-07	26.2096	0.564508	0.259834
gls41.ar1	0.847198	-70.1891	150.378	153.455	7.15357e-07	26.7925	0.113502	0.171557
gls39.ar1	0.844668	-70.3368	150.674	153.751	6.17076e-07	27.0881	0.21445	0.0609029
gls8s.ar1	0.843438	-70.4078	150.816	153.893	5.74796e-07	27.23	0.0257285	0.748459
gls49.ar1	0.842195	-70.479	150.958	154.035	5.35312e-07	27.3724	0.197289	0.0456015
gls60s.ar1	0.925861	-63.6803	143.361	154.561	4.11582e-07	27.8981	0.354549	0.463184
gls6s.ar1	0.8354	-70.8584	151.717	154.794	3.6628e-07	28.1313	0.616815	0.203347
gls19.ar1	0.800092	-72.6075	153.215	154.929	3.42288e-07	28.2668	0.000564955	0.470074
gls50.ar1	0.829395	-71.1809	152.362	155.439	2.65317e-07	28.7762	0.0219813	0.419496
gls53s.ar1	0.887825	-67.4073	148.815	156.451	1.59935e-07	29.7885	0.284868	0.627211
gls33s.ar1	0.780976	-73.4294	154.859	156.573	1.50466e-07	29.9106	0.207327	0.0182746
gls26s.ar1	0.853838	-69.7892	151.578	156.578	1.50063e-07	29.916	0.0227097	0.380995
gls44s.ar1	0.883365	-67.7582	149.516	157.153	1.12606e-07	30.4903	0.567111	0.31491
gls3.ar1	0.732982	-75.2126	156.425	157.225	1.086e-07	30.5627	9.85811e-05	0.932183
gls28.ar1	0.841071	-70.5429	153.086	158.086	7.06263e-08	31.4233	0.150161	0.318254
gls57s.ar1	0.876563	-68.2684	150.537	158.173	6.7609e-08	31.5106	0.0858928	0.386914
gls34.ar1	0.750082	-74.617	157.234	158.948	4.58868e-08	32.2857	0.0235537	0.280334
gls52.ar1	0.79151	-72.9858	155.972	159.048	4.36431e-08	32.386	0.00138054	0.631564
gls10s.ar1	0.789923	-73.0541	156.108	159.185	4.07633e-08	32.5225	0.0294426	0.22344
gls25.ar1	0.786613	-73.1948	156.389	159.466	3.5413e-08	32.8039	0.0720326	0.215238
gls37s.ar1	0.822076	-71.559	155.118	160.118	2.55675e-08	33.4554	0.327754	0.386574
gls21.ar1	0.777764	-73.5605	157.121	160.198	2.45665e-08	33.5353	0.311762	0.300961
gls41s.ar1	0.817878	-71.7689	155.538	160.538	2.07267e-08	33.8752	0.110589	0.298533
gls19s.ar1	0.768419	-73.9312	157.862	160.939	1.69569e-08	34.2767	0.00791665	0.384971
gls55s.ar1	0.853529	-69.8082	153.616	161.253	1.44964e-08	34.5903	0.666892	0.0886144
gls50s.ar1	0.804839	-72.3912	156.782	161.782	1.11241e-08	35.1199	0.0106923	0.68783
gls36.ar1	0.702291	-76.1918	160.384	162.098	9.50043e-09	35.4354	0.000574988	0.501623
gls12.ar1	0.74482	-74.8045	159.609	162.686	7.08051e-09	36.0234	0.0943707	0.199365
gls9.ar1	0.690326	-76.5465	161.093	162.807	6.66387e-09	36.1447	0.0662257	0.129576
gls49s.ar1	0.79289	-72.926	157.852	162.852	6.51613e-09	36.1895	0.594331	0.0639744
gls23.ar1	0.737979	-75.0426	160.085	163.162	5.58037e-09	36.4996	0.0599201	0.112231
gls48.ar1	0.681171	-76.8087	161.617	163.332	5.12681e-09	36.6691	0.000254129	0.48188
gls39s.ar1	0.786008	-73.2202	158.44	163.44	4.85543e-09	36.7779	0.656272	0.0585511
gls3s.ar1	0.669762	-77.1251	162.25	163.964	3.73612e-09	37.302	0.00688553	0.267962
gls34s.ar1	0.710215	-75.949	161.898	164.975	2.25426e-09	38.3124	0.0116381	0.626311
gls5.ar1	0.643726	-77.8081	163.616	165.331	1.88716e-09	38.6679	0.202628	0.171978
gls18.ar1	0.643709	-77.8085	163.617	165.331	1.88638e-09	38.6688	0.0458423	0.296681
gls17.ar1	0.637777	-77.9571	163.914	165.629	1.62585e-09	38.966	0.0836015	0.0542298
gls28s.ar1	0.812406	-72.0353	158.071	165.707	1.5633e-09	39.0445	0.121325	0.770473
gls33.ar1	0.696019	-76.3795	162.759	165.836	1.46578e-09	39.1733	0.56941	0.0382666
gls7.ar1	0.633228	-78.0695	164.139	165.853	1.45311e-09	39.1907	0.0713753	0.0515908
gls25s.ar1	0.750464	-74.6032	161.206	166.206	1.21786e-09	39.5439	0.0705831	0.50733
gls52s.ar1	0.745374	-74.7849	161.57	166.57	1.01549e-09	39.9073	0.0175111	0.337834
gls32.ar1	0.542331	-80.0621	166.124	166.924	8.50626e-10	40.2616	0.000114259	0.308377
gls21s.ar1	0.739193	-75.0008	162.002	167.002	8.18331e-10	40.3391	0.178596	0.866252
gls2.ar1	0.499658	-80.8644	167.729	168.529	3.81324e-10	41.8663	0.0550468	0.111
gls1.ar1	0.49295	-80.9843	167.969	168.768	3.38253e-10	42.106	0.09543	0.0159988
gls9s.ar1	0.633362	-78.0661	166.132	169.209	2.7136e-10	42.5467	0.0452746	0.458316
gls20.ar1	0.557877	-79.7511	167.502	169.216	2.70382e-10	42.5539	0.00221831	0.449168
gls36s.ar1	0.626355	-78.2365	166.473	169.55	2.28846e-10	42.8875	0.0170915	0.216893
gls48s.ar1	0.616948	-78.4603	166.921	169.998	1.82961e-10	43.3351	0.00421567	0.379872
gls12s.ar1	0.689225	-76.5784	165.157	170.157	1.68958e-10	43.4943	0.063273	0.648177
gls18s.ar1	0.592615	-79.0146	168.029	171.106	1.05109e-10	44.4436	0.0400061	0.577687
gls23s.ar1	0.658848	-77.4177	166.835	171.835	7.29908e-11	45.1729	0.420399	0.103453
gls5s.ar1	0.567529	-79.5524	169.105	172.182	6.1386e-11	45.5192	0.0985454	0.73778
gls4.ar1	0.375925	-82.8532	171.706	172.506	5.21878e-11	45.8439	0.00163367	0.296983
gls32s.ar1	0.436664	-81.9317	171.863	173.578	3.05466e-11	46.9151	0.00434792	0.22369
gls17s.ar1	0.526564	-80.3669	170.734	173.811	2.7185e-11	47.1483	0.438781	0.0573153
gls2s.ar1	0.42859	-82.0597	172.119	173.834	2.68743e-11	47.1713	0.0397284	0.453336
gls16.ar1	0.278837	-84.1546	174.309	175.109	1.42036e-11	48.4466	0.000667966	0.225739
gls7s.ar1	0.486416	-81.0995	172.199	175.276	1.3067e-11	48.6134	0.299654	0.0910158
gls20s.ar1	0.463083	-81.4994	172.999	176.076	8.76018e-12	49.4132	0.0341134	0.244534
gls1s.ar1	0.286973	-84.0525	176.105	177.819	3.66364e-12	51.1567	0.325283	0.0428739
gls0.ar1	NA	-87.0966	178.193	178.443	2.68178e-12	51.7806	9.37604e-05	NA
gls4s.ar1	0.228184	-84.7655	177.531	179.245	1.79574e-12	52.5828	0.0372359	0.111928
gls16s.ar1	0.14503	-85.6864	179.373	181.087	7.1501e-13	54.4245	0.00730183	0.231067
gls0s.ar1	-0.224164	-88.9169	183.834	184.634	1.21378e-13	57.9713	0.00440223	0.106838

## Sheet: PDE.WR
PDE data: least congruent reverse-chronological
	R2	logLik	AIC	AICc	wAICc	Δ(AICc)	JB	BP
gls63.ar1	0.984397	-50.8613	117.723	128.923	0.446714	0	0.305017	0.245843		Model: 63.ar1
gls47.ar1	0.976854	-54.4102	122.82	130.457	0.207429	1.53426	0.353911	0.208959		Variable	Estimate	Std. Error	p-value
gls62.ar1	0.975475	-54.9313	123.862	131.499	0.123195	2.5763	0.101688	0.273768		(Intercept)	-17100.1	64322.2	0.7953
gls59.ar1	0.97525	-55.0133	124.026	131.663	0.113496	2.7403	0.153255	0.107365		Sea level	3.915	1.75	0.0466
gls45.ar1	0.963905	-58.4093	128.819	133.819	0.0386251	4.89603	0.114478	0.253707		δ18O	-38.301	14.48	0.0228
gls43.ar1	0.962513	-58.7498	129.5	134.5	0.0274779	5.57707	0.283883	0.0495642		δ34S	10.214	7.09	0.1778
gls56.ar1	0.958474	-59.6707	131.341	136.341	0.0109403	7.41892	0.000828848	0.346255		δ13C	-4.348	10.63	0.6903
gls61.ar1	0.96648	-57.7432	129.486	137.123	0.00740282	8.20011	0.000215445	0.33094		87Sr/89Sr	24098.4	91156.1	0.7964
gls46.ar1	0.950797	-61.1975	134.395	139.395	0.00237661	10.4725	0.00123843	0.189102		Cont. Frag.	-579.076	524.85	0.2934
gls54.ar1	0.950734	-61.2091	134.418	139.418	0.0023493	10.4956	0.000105707	0.241936
gls31.ar1	0.961897	-58.8965	131.793	139.429	0.00233616	10.5068	0.0869119	0.475135
gls63s.ar1	0.980692	-52.7788	123.558	139.558	0.00219102	10.6351	0.509344	0.370313		Model: 47.ar1
gls62s.ar1	0.971665	-56.2307	128.461	139.661	0.00208038	10.7387	0.330466	0.427954		Variable	Estimate	Std. Error	p-value
gls40.ar1	0.937776	-63.3106	136.621	139.698	0.00204235	10.7756	0.00547381	0.312635		(Intercept)	-28787.7	56165.3	0.6176
gls47s.ar1	0.971355	-56.3288	128.658	139.858	0.00188584	10.9351	0.53044	0.350896		Sea level	3.73	1.7	0.049
gls59s.ar1	0.970866	-56.4812	128.962	140.162	0.00161929	11.2399	0.338927	0.225102		δ18O	-39.58	14	0.0153
gls58.ar1	0.948244	-61.6528	135.306	140.306	0.00150743	11.383	6.4141e-11	0.792889		87Sr/89Sr	40668.1	79585.9	0.6186
gls45s.ar1	0.958395	-59.6879	133.376	141.012	0.00105882	12.0895	0.311545	0.350954		δ34S	10.81	6.9	0.1433
gls27.ar1	0.94485	-62.2245	136.449	141.449	0.000851067	12.5264	0.275506	0.515973		Cont. Frag.	-674.04	450.81	0.1607
gls30.ar1	0.944475	-62.2854	136.571	141.571	0.000800751	12.6482	0.0214977	0.372009
gls43s.ar1	0.955747	-60.2432	134.486	142.123	0.000607648	13.2002	0.439898	0.152976
gls38.ar1	0.927059	-64.7407	139.482	142.558	0.000488703	13.6358	0.000551272	0.110047		Model: 62.ar1
gls56s.ar1	0.952637	-60.8544	135.709	143.345	0.000329751	14.4227	0.0200581	0.530668		Variable	Estimate	Std. Error	p-value
gls42.ar1	0.923152	-65.2104	140.421	143.498	0.000305542	14.5752	1.97691e-07	0.72978		(Intercept)	-21654.7	73442.4	0.7731
gls29.ar1	0.938024	-63.2747	138.549	143.549	0.000297747	14.6269	0.338651	0.288316		δ18O	-43.49	16.65	0.0227
gls15.ar1	0.937871	-63.2969	138.594	143.594	0.000291222	14.6712	0.039532	0.314702		87Sr/89Sr	30474.6	104079	0.7747
gls51.ar1	0.921752	-65.3729	140.746	143.823	0.000259714	14.9002	9.22262e-13	0.799969		δ34S	14.629	8.25	0.1014
gls13.ar1	0.919186	-65.6633	141.327	144.404	0.000194258	15.481	0.019592	0.26963		δ13C	-2.14	12.86	0.8706
gls22.ar1	0.914359	-66.1854	142.371	145.448	0.000115252	16.5251	0.553164	0.147647		Cont. Frag.	-232.228	590.31	0.7009
gls61s.ar1	0.95999	-59.3361	134.672	145.872	9.32082e-05	16.9497	0.00676541	0.251737
gls40s.ar1	0.928995	-64.4986	140.997	145.997	8.75601e-05	17.0747	0.0392386	0.53308
gls11.ar1	0.910612	-66.5709	143.142	146.219	7.83854e-05	17.2961	0.139414	0.365762
gls14.ar1	0.90893	-66.7386	143.477	146.554	6.6281e-05	17.6315	0.278786	0.184583
gls24.ar1	0.906173	-67.007	144.014	147.091	5.06797e-05	18.1683	0.0278001	0.460336
gls54s.ar1	0.941263	-62.7916	139.583	147.22	4.75238e-05	18.2969	0.00344349	0.227047
gls46s.ar1	0.941157	-62.8077	139.615	147.252	4.67608e-05	18.3293	0.0216262	0.160037
gls58s.ar1	0.939202	-63.102	140.204	147.84	3.48409e-05	18.9178	1.88353e-08	0.646824
gls35.ar1	0.881982	-69.0715	146.143	147.857	3.45478e-05	18.9347	7.74496e-09	0.699702
gls60.ar1	0.938623	-63.1872	140.374	148.011	3.19953e-05	19.0882	0.236397	0.303534
gls6.ar1	0.874618	-69.6162	147.232	148.947	2.00373e-05	20.0242	0.48479	0.0792793
gls30s.ar1	0.934188	-63.8152	141.63	149.267	1.70742e-05	20.3442	0.0194553	0.673698
gls31s.ar1	0.951545	-61.0596	138.119	149.319	1.66318e-05	20.3967	0.0623054	0.797096
gls38s.ar1	0.91318	-66.3084	144.617	149.617	1.43326e-05	20.6943	0.0101493	0.133868
gls8.ar1	0.865118	-70.2735	148.547	150.261	1.03841e-05	21.3388	0.0261493	0.305469
gls42s.ar1	0.909252	-66.7067	145.413	150.413	9.62418e-06	21.4908	1.12506e-05	0.56525
gls27s.ar1	0.929635	-64.4172	142.834	150.471	9.35174e-06	21.5482	0.134105	0.890062
gls51s.ar1	0.908409	-66.79	145.58	150.58	8.85522e-06	21.6573	4.03826e-10	0.685907
gls44.ar1	0.908007	-66.8293	145.659	150.659	8.51345e-06	21.7361	0.259256	0.159497
gls26.ar1	0.882101	-69.0624	148.125	151.202	6.48894e-06	22.2791	0.00102775	0.726406
gls53.ar1	0.903235	-67.2845	146.569	151.569	5.40058e-06	22.6463	0.304939	0.182056
gls13s.ar1	0.90321	-67.2868	146.574	151.574	5.38791e-06	22.651	0.0137562	0.611667
gls57.ar1	0.901748	-67.4217	146.844	151.844	4.7078e-06	22.9209	0.039502	0.305959
gls29s.ar1	0.920902	-65.4701	144.94	152.577	3.26303e-06	23.654	0.600769	0.271807
gls15s.ar1	0.920005	-65.5717	145.143	152.78	2.94802e-06	23.8571	0.0162618	0.63006
gls24s.ar1	0.893668	-68.1331	148.266	153.266	2.31149e-06	24.3436	0.0228217	0.743982
gls22s.ar1	0.889355	-68.4909	148.982	153.982	1.61614e-06	25.0593	0.582724	0.223326
gls55.ar1	0.88868	-68.5456	149.091	154.091	1.53017e-06	25.1686	0.104987	0.100757
gls35s.ar1	0.861401	-70.5182	151.036	154.113	1.51329e-06	25.1908	6.12745e-07	0.602061
gls10.ar1	0.832543	-72.2205	152.441	154.155	1.48191e-06	25.2327	0.00075172	0.673297
gls41.ar1	0.856927	-70.8041	151.608	154.685	1.13701e-06	25.7625	0.0481556	0.203891
gls11s.ar1	0.883889	-68.9248	149.85	154.85	1.04722e-06	25.9271	0.0411586	0.777183
gls37.ar1	0.85305	-71.0448	152.09	155.167	8.93797e-07	26.2439	0.24426	0.0951799
gls14s.ar1	0.881398	-69.1159	150.232	155.232	8.65103e-07	26.3092	0.453661	0.249514
gls8s.ar1	0.845806	-71.4779	152.956	156.033	5.79637e-07	27.1101	0.0125089	0.756996
gls39.ar1	0.844281	-71.5664	153.133	156.21	5.30501e-07	27.2872	0.115657	0.0504744
gls19.ar1	0.807021	-73.4972	154.994	156.709	4.13394e-07	27.7861	0.000269514	0.450561
gls49.ar1	0.83982	-71.8206	153.641	156.718	4.11425e-07	27.7956	0.0876203	0.0371067
gls60s.ar1	0.924573	-65.0424	146.085	157.285	3.09908e-07	28.3623	0.232079	0.496436
gls6s.ar1	0.834364	-72.1221	154.244	157.321	3.04348e-07	28.3985	0.50768	0.183378
gls50.ar1	0.83381	-72.1521	154.304	157.381	2.95339e-07	28.4586	0.00561408	0.453777
gls26s.ar1	0.859805	-70.6213	153.243	158.243	1.91995e-07	29.3199	0.0141052	0.443659
gls44s.ar1	0.884629	-68.8673	151.735	159.371	1.09208e-07	30.4483	0.303308	0.275361
gls3.ar1	0.736472	-76.3014	158.603	159.403	1.07484e-07	30.4802	3.34383e-05	0.888434
gls33s.ar1	0.774956	-74.8806	157.761	159.476	1.03644e-07	30.5529	0.0950934	0.0143978
gls57s.ar1	0.883481	-68.9564	151.913	159.549	9.98947e-08	30.6266	0.0317038	0.471433
gls53s.ar1	0.882103	-69.0622	152.125	159.761	8.98637e-08	30.8383	0.180008	0.585878
gls28.ar1	0.843046	-71.6375	155.275	160.275	6.94894e-08	31.3525	0.0503227	0.336754
gls52.ar1	0.800375	-73.8019	157.604	160.681	5.67337e-08	31.7581	0.000593993	0.581701
gls25.ar1	0.798579	-73.8825	157.765	160.842	5.23389e-08	31.9194	0.0219963	0.247758
gls34.ar1	0.75559	-75.6236	159.247	160.961	4.93043e-08	32.0388	0.0062688	0.320242
gls10s.ar1	0.795633	-74.0132	158.026	161.103	4.59277e-08	32.1807	0.0173651	0.266304
gls41s.ar1	0.828622	-72.4288	156.858	161.858	3.14975e-08	32.935	0.0458683	0.37016
gls21.ar1	0.777731	-74.7689	159.538	162.615	2.15702e-08	33.6922	0.233381	0.33661
gls37s.ar1	0.818654	-72.9376	157.875	162.875	1.89367e-08	33.9527	0.139216	0.370557
gls19s.ar1	0.774121	-74.9139	159.828	162.905	1.86588e-08	33.9822	0.00467651	0.421677
gls55s.ar1	0.853642	-71.0084	156.017	163.653	1.2834e-08	34.7307	0.469881	0.091074
gls50s.ar1	0.807722	-73.4644	158.929	163.929	1.11818e-08	35.0063	0.00344455	0.696261
gls36.ar1	0.711059	-77.1299	162.26	163.974	1.09315e-08	35.0516	0.000221639	0.441536
gls9.ar1	0.707682	-77.2345	162.469	164.183	9.84591e-09	35.2607	0.020498	0.152666
gls12.ar1	0.752827	-75.7247	161.45	164.526	8.29392e-09	35.6038	0.021025	0.215726
gls48.ar1	0.686937	-77.8516	163.703	165.417	5.31215e-09	36.4949	6.02669e-05	0.430975
gls23.ar1	0.739375	-76.2017	162.403	165.48	5.14783e-09	36.5577	0.0267977	0.111787
gls49s.ar1	0.788126	-74.3379	160.676	165.676	4.6686e-09	36.7531	0.370534	0.0661009
gls39s.ar1	0.786503	-74.4066	160.813	165.813	4.35863e-09	36.8905	0.447666	0.0572661
gls3s.ar1	0.672924	-78.2457	164.491	166.206	3.58196e-09	37.283	0.00338546	0.299777
gls34s.ar1	0.714172	-77.0324	164.065	167.142	2.243e-09	38.2192	0.00359408	0.671455
gls5.ar1	0.65134	-78.8208	165.642	167.356	2.01531e-09	38.4333	0.120391	0.213084
gls18.ar1	0.650384	-78.8454	165.691	167.405	1.96624e-09	38.4826	0.0192754	0.321962
gls25s.ar1	0.762185	-75.3774	162.755	167.755	1.65097e-09	38.8321	0.021286	0.523243
gls28s.ar1	0.813506	-73.1895	160.379	168.015	1.44918e-09	39.0929	0.0514773	0.735304
gls17.ar1	0.634997	-79.2331	166.466	168.18	1.33442e-09	39.2579	0.0567128	0.0468217
gls7.ar1	0.634705	-79.2403	166.481	168.195	1.32484e-09	39.2723	0.0367041	0.0506649
gls52s.ar1	0.755025	-75.6443	163.289	168.289	1.26413e-09	39.3661	0.0100547	0.363475
gls33.ar1	0.69	-77.7631	165.526	168.603	1.08023e-09	39.6805	0.336483	0.0380504
gls32.ar1	0.544566	-81.2252	168.45	169.25	7.81542e-10	40.3278	2.48632e-05	0.261767
gls21s.ar1	0.736202	-76.3106	164.621	169.621	6.49294e-10	40.6986	0.140764	0.853235
gls9s.ar1	0.651289	-78.8221	167.644	170.721	3.74613e-10	41.7986	0.0136917	0.473102
gls2.ar1	0.504074	-81.9918	169.984	170.784	3.63106e-10	41.861	0.0253489	0.12265
gls20.ar1	0.574458	-80.6142	169.228	170.943	3.35335e-10	42.0201	0.000976803	0.4008
gls1.ar1	0.487749	-82.2833	170.566	171.367	2.71294e-10	42.444	0.0697461	0.0132525
gls36s.ar1	0.637975	-79.1594	168.319	171.396	2.67374e-10	42.4731	0.00963526	0.231932
gls12s.ar1	0.699438	-77.4848	166.97	171.97	2.00666e-10	43.0471	0.0147773	0.610174
gls48s.ar1	0.621595	-79.5576	169.115	172.192	1.79538e-10	43.2696	0.0016485	0.384217
gls18s.ar1	0.595283	-80.1626	170.325	173.402	9.80415e-11	44.4796	0.0208939	0.56167
gls23s.ar1	0.659317	-78.6125	169.225	174.225	6.49728e-11	45.3024	0.269497	0.108693
gls5s.ar1	0.575982	-80.5819	171.164	174.241	6.44632e-11	45.3182	0.0546984	0.754297
gls4.ar1	0.388777	-83.8731	173.746	174.546	5.53335e-11	45.6236	0.000692545	0.256469
gls32s.ar1	0.439416	-83.0948	174.19	175.904	2.80664e-11	46.9812	0.00171344	0.225939
gls2s.ar1	0.425483	-83.3157	174.631	176.346	2.25024e-11	47.4231	0.0226685	0.449615
gls17s.ar1	0.521449	-81.6708	173.342	176.418	2.16977e-11	47.496	0.315632	0.0631398
gls16.ar1	0.289679	-85.2254	176.451	177.251	1.43117e-11	48.3282	0.000269725	0.203765
gls7s.ar1	0.49392	-82.1742	174.348	177.425	1.31159e-11	48.5027	0.189524	0.0881279
gls20s.ar1	0.480747	-82.4055	174.811	177.888	1.04077e-11	48.9653	0.0193857	0.260529
gls1s.ar1	0.29008	-85.2203	178.441	180.155	3.35021e-12	51.2323	0.238152	0.0423318
gls0.ar1	NA	-88.3037	180.607	180.857	2.35782e-12	51.9349	3.13562e-05	NA
gls4s.ar1	0.243815	-85.7885	179.577	181.291	1.89803e-12	52.3687	0.0206838	0.12145
gls16s.ar1	0.152127	-86.8185	181.637	183.351	6.77609e-13	54.4287	0.00426054	0.253098
gls0s.ar1	-0.230088	-90.1675	186.335	187.135	1.02178e-13	58.2124	0.00242191	0.123727
